# Supplementary material
Source: bioRxiv or medRxiv preprint supplement (https://www.biorxiv.org/content/biorxiv/early/2019/06/04/586685/DC1/embed/media-1.pdf)
Supplement: Supplementary file [file media-1.pdf]

**S1 Table1. Discussion Facilitation versus Age (>55 versus ≤55)**

| Question                                                                                                                                            | Age ≤55             | Age>55              | Significance (≤55 vs >55)                            |
|-----------------------------------------------------------------------------------------------------------------------------------------------------|---------------------|---------------------|------------------------------------------------------|
| Did the grant application discussions facilitate reviewer participation?                                                                            | Y=90%<br>[87%-93%]  | Y=95%<br>[93%-97%]  | $X^2[1]=4.8$ , $p=0.027$ , $d=0.20$                  |
| How useful were the grant application discussions in clarifying differing reviewer opinions?                                                        | 2.25<br>[2.14-2.36] | 2.00<br>[1.88-2.11] | $U[412, 327]=58,707$ ;<br>$p=0.003^{**}$ , $d= 0.23$ |
| Was the format and duration of the grant application discussions sufficient to allow the non-assigned reviewers to cast well informed merit scores? | Y=76%<br>[72%=80%]  | Y=79%<br>[74%-84%]  | $X^2[1]=0.55$ , $p=0.456$ , $d=0.07$                 |
| How useful was the Chair in facilitating the application discussions?                                                                               | 2.25<br>[2.14-2.36] | 2.04<br>[1.93-2.14] | $U[407, 325]=59,922$ ; $p=0.021$ ,<br>$d= 0.19$      |
